# Supplementary material
Source: PubMed Central journal article supplement (PMC2786551)
Supplement: supp_191_23_7343__1.pdf [file supp_191_23_7343__1.pdf]

**Cag3 is a novel essential component of the *Helicobacter pylori* Cag Type IV secretion system outer membrane subcomplex**

Delia M. Pinto-Santini<sup>1,2</sup> and Nina R. Salama<sup>1</sup>

<sup>1</sup>Division of Human Biology, Fred Hutchinson Cancer Research Center, Seattle, Washington 98109, <sup>2</sup>Molecular and Cellular Biology Graduate Program, University of Washington, Seattle, Washington 98195

**Supplemental Material**

**Figure S1.** *H. pylori* strains expressing HpVirB7-3XFLAG sustain *cagT4SS* activity.

**Figure S2.** Cag3 migrates primarily in a single peak in a strain lacking the *cagPAI*.

**Figure S3.** Cag3 steady state levels are reduced in a  $\Delta HpVirB7$  strain.

**Table S1.** Predicted T4S system components encoded in the *H. pylori cagPAI*

**Table S2.** Oligos used in this study.

**Table S3.** Cag3 interacting non-*cag* PAI proteins identified by mass spectrometry after anti-Cag3 affinity purification.

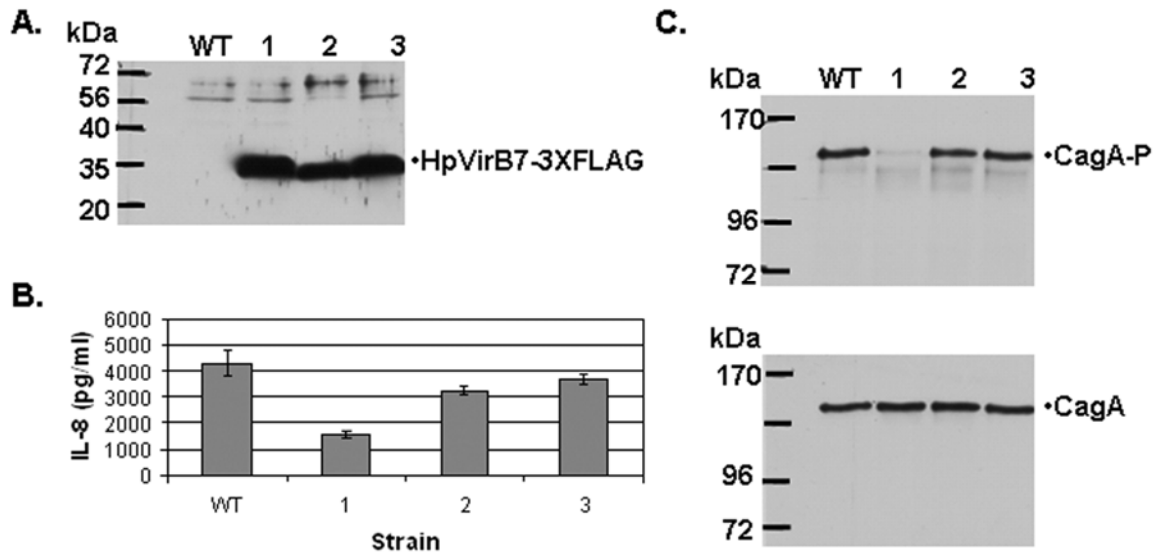

**Figure S1. *H. pylori* strains expressing HpVirB7-3XFLAG retain Cag T4S activity.** **A.** Immunoblot analysis of total protein extracts from WT (NSH57 not expressing HpVirB7-3XFLAG) and strains 1, 2, and 3 (chloramphenicol resistant clones predicted to express the HpVirB7-3XFLAG) separated by 10% SDS-PAGE and probed with anti-M2 antibody to detect HpVirB7-3XFLAG. Molecular weight markers sizes in kDa are indicated. As shown strains 1, 2 and 3 expressed the predicted 35 kDa HpVirB7-3XFLAG. **B.** Induction of IL-8 secretion. Media harvested from a co-culture experiment with AGS cells for 24 hours at a multiplicity of infection of 10:1 (in triplicate) was used for determination of secreted IL-8 by ELISA. Means from a representative experiment are shown. Error bars indicate one standard deviation. **C.** Total protein extracts from same co-culture experiment used in B. were separated by 6% SDS-PAGE and probed with  $\alpha$ -mouse 4G10 (upper panel) to detect CagA phosphorylation and subsequently probed with  $\alpha$ -rabbit CagA antibody to detect total CagA (lower panel). Strains 2 and 3 were able to sustain wild-type Cag T4SS as seen by their ability to induce IL-8 secretion and host catalyzed CagA phosphorylation. Strain 3 (NSH57, *HpVirB7::3xFLAG::cat*) was used for all subsequent experiments in this study.

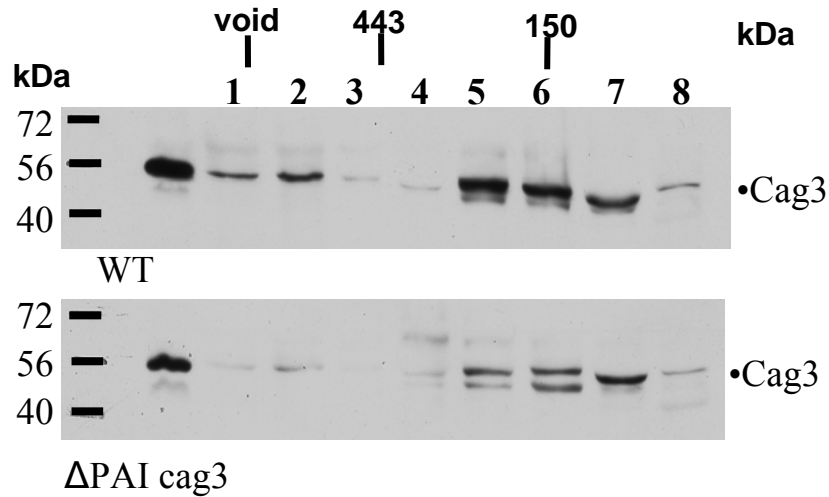

**Figure S2. Cag3 migrates primarily in a single peak in a strain lacking the *cagPAI*.** Whole cell extracts of WT (upper panel) and  $\Delta PAI$  *cag3* (lower panel) strains were fractionated on a SuperDex 200 gel filtration column and the presence of Cag3 in each fraction was determined by immunoblotting with  $\alpha$ -rabbit-Cag3. Molecular weight markers sizes in kDa are indicated. Fraction 1 is the void volume at which Dextran Blue eluted, the 443 kDa marker eluted in fraction 3 and the 150 kDa marker eluted in fraction 6. WT: *HpVirB7-3XFLAG::cat*;  $\Delta PAI$  *cag3*:  $\Delta cagPAI::aphA3 rdxA::cag3$ .

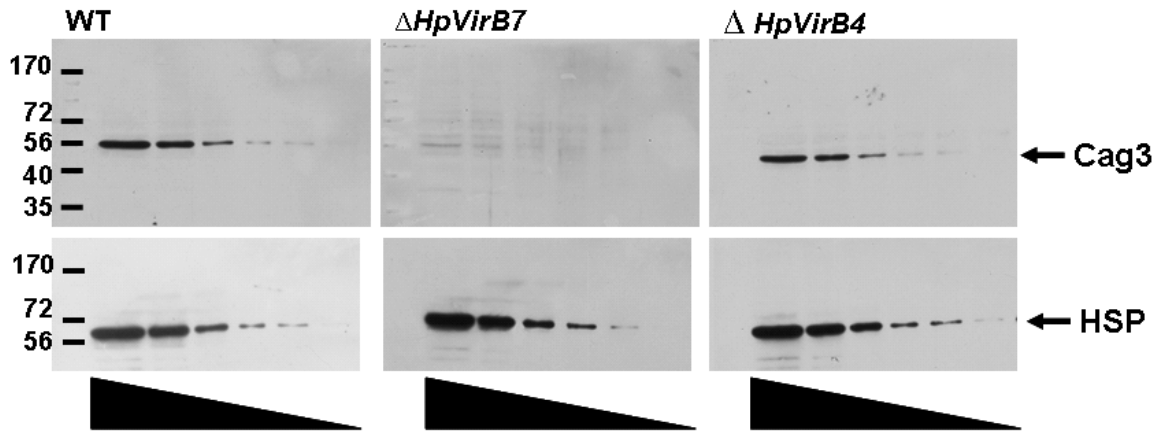

**Figure S3.** Cag3 steady state levels are reduced in a  $\Delta$ HpVirB7 strain. Equal amounts of *H. pylori* cells from the indicated strains were washed with PBS and resuspended in same volume of 2.5% SDS buffer. Serial three fold dilutions of whole cells extracts were separated by 10% SDS-PAGE and Cag3 steady state levels were assessed by immunoblotting with  $\alpha$ -rabbit-Cag3 antibody. Immunoblots were stripped and reblotted with  $\alpha$ -mouse-HSP antibody as a loading control. Molecular weight markers sizes in kDa are indicated. WT: wild-type;  $\Delta$ HpVirB7: *HpvirB7::cat*;  $\Delta$ HpVirB4: *HpvirB4::cat* .

**Table S1. Predicted T4S system components encoded in the *H. pylori* cagPAI**

| <i>H. pylori</i><br>26695<br>annotation | Predicted<br>signal<br>peptide | <i>A. tumefaciens</i><br>homologue | Putative function<br>and/or subcellular<br>location | Length <sup>a</sup> in<br><i>H. pylori</i> | Length <sup>a</sup> in<br><i>A.</i><br><i>tumefaciens</i> |
|-----------------------------------------|--------------------------------|------------------------------------|-----------------------------------------------------|--------------------------------------------|-----------------------------------------------------------|
| HP0523                                  | yes                            | VirB1                              | Transglycosylase                                    | 169                                        | 239                                                       |
| HP0524                                  | no                             | VirD4                              | Inner membrane<br>ATPase                            | 748                                        | 668                                                       |
| HP0525                                  | no                             | VirB11                             | Inner membrane<br>ATPase                            | 330                                        | 343                                                       |
| HP0527                                  | no                             | VirB10                             | Inner and outer<br>membrane                         | 1927                                       | 377                                                       |
| HP0528                                  | yes                            | VirB9                              | Outer membrane<br>Secretin-like                     | 522                                        | 293                                                       |
| HP0529                                  | no                             | VirB6                              | Inner membrane                                      | 535                                        | 295                                                       |
| HP0530                                  | no                             | VirB8                              | Inner membrane                                      | 252                                        | 237                                                       |
| HP0532                                  | yes                            | VirB7                              | Outer membrane<br>lipoprotein                       | 280                                        | 52                                                        |
| HP0539                                  | yes                            | VirB5                              | Pilus-associated<br>adhesin                         | 237                                        | 220                                                       |
| HP0544                                  | yes                            | VirB4                              | Inner membrane<br>ATPase                            | 983                                        | 789                                                       |
| HP0546                                  | yes                            | VirB2                              | Main pilus<br>subunit                               | 115                                        | 121                                                       |

<sup>a</sup>total number of amino acid residues

**Table S2.** Oligos used in this study.

| Name                    | Sequence                                         |
|-------------------------|--------------------------------------------------|
| 5'N1cag3 oligo 1        | 5' CACAAGCGACCTATAAAATGATAC 3'                   |
| 3'C1cag3stopcat oligo 2 | 5'ACCGCTGTATAGCTCATAGGTgatatagattgaaaagtggat 3'  |
| 5'N2cag3 oligo 3        | 5'cccagtttgtegcactgataaTTACTAACCTCTAACACTCTT 3'  |
| 3'C2 cag3 oligo 4       | 5'CAACAACCTATTTATCCATAGAAAAC3'                   |
| 3'C1cag3stopkan oligo 2 | 5'acagaataactctatgaagcgACCGCTGTATAGCTCATAGGT 3'  |
| 5'N2cag3Kan oligo 3     | 5'atctaggtactaaaacaattcTTACTAACCTCTAACACTCTT 3'  |
| HpVirD4 oligo 1         | 5'GCTCTAGAGTCTTATTGAGGGGCTTTAAAG 3'              |
| HpVirD4 oligo 2         | 5'GTGGGTTCAAGTGAAGTGTGAgtegcacGCGT 3'            |
| HpVirD4 oligo 3         | 5'atccacttttcaatctatatacTATAGATGGGCTGAAAGAAAG 3' |
| HpVirD4 oligo 4         | 5'cccagtttgtegcactgataaGGTAGGAATGGCGCTAAGACT 3'  |
| HpVirB11 oligo 1        | 5'gctctagAAAAGAGCTAAATTGATAACCC 3'               |
| HpVirB11 oligo 2        | 5'acgcgtcgacAATAACGCTATTAACCCCTATG 3'            |
| HpVirB11 oligo 3        | 5'atccacttttcaatctatatacGCTCGGTGTTGTGCAAGTTTT 3' |
| HpVirB11 oligo 4        | 5'cccagtttgtegcactgataaCATACGATTTTTTATAATGTGC 3' |
| HpVirB10 oligo 1        | 5'gctctagaAAACTATGGTGAATTGGAGCG 3'               |
| HpVirB10 oligo 2        | 5'GGCTCTTCTAGAGGATATAGTgtegcacGCGT 3'            |
| HpVirB10 oligo 3        | 5'atccacttttcaatctatatacGTCTAGCAGACAAGTTATTCA 3' |
| HpVirB10 oligo 4        | 5'cccagtttgtegcactgataaGCAACTGATGAATATCCCCC 3'   |
| HpVirB9 oligo 1         | 5'gctctagaAATGGTTGGAAGAGTTGGTGG 3'               |
| HpVirB9 oligo 2         | 5'AAGCCCAACAAGATTCACCCCGtegcacGCGT 3'            |
| HpVirB9 oligo 3         | 5'atccacttttcaatctatatacGGTTGGAGTATTGTGCCTAAT 3' |
| HpVirB9 oligo 4         | 5'cccagtttgtegcactgataaTTTGTGGTTCAACCTGATGGG 3'  |
| HpVirB6 oligo 1         | 5'gctctagAGACGGTAAGCGAAATTTTGAG 3'               |
| HpVirB6 oligo 2         | 5'GTGGGTTCAAGTGAAGTGTGAgtegcacGCGT 3'            |
| HpVirB6 oligo 3         | 5'atccacttttcaatctatatacTATAGATGGGCTGAAAGAAAG 3' |
| HpVirB6 oligo 4         | 5'cccagtttgtegcactgataaTTCAATTTGACCATAACGCCC 3'  |
| HpVirB7 oligo 1         | 5'GctctagAAGGCGGTGCAGAATGAAACTA 3'               |
| HpVirB7 oligo 2         | 5'AGAGAGAAACGCCAACGGGCGGTTCGACGCGT 3'            |
| HpVirB7 oligo 3         | 5'atccacttttcaatctatatacGATTACGCTCATAGGCGATGC 3' |
| HpVirB7 oligo 4         | 5'cccagtttgtegcactgataaTGGCAAGAGAAAAAGCTCAGC 3'  |
| HpVirB4 oligo 1         | 5'GCTCTAGATATACGATTACATGTGAAGCG 3'               |
| HpVirB4 oligo 2         | 5'GCGCGAACAAAAATTATTGAAgtegcacGCGT 3'            |
| HpVirB4 oligo 3         | 5'atccacttttcaatctatatacGCGATTGTTATTGTGCTTGTA 3' |
| HpVirB4 oligo 4         | 5'cccagtttgtegcactgataaTTTTTTTGGAGAAACGATGGGG 3' |
| Ucag3Eco                | 5'GCGTACTGAAAGATTCAAAGgaattcCGCA 3'              |
| Cag3CSaI                | 5'gtegcacTACTTACCTTAAATGCAA 3'                   |
| Cag3Bam5-23             | 5'ACGCGGATCCAAAGAAATAAGTGAAGCCGAT 3'             |
| Cag3EcoR1               | 5'GCGTACTGAAAGATTCAAAGGAATTCGCA 3'               |
| CagMF                   | 5'TTTTGGATATGGAAAAATTTTG 3'                      |
| CagMR                   | 5'ATTGATAGCGTTTAAGCCC 3'                         |
| Kan5'                   | 5'ACAGAATAACTCTATGAAGCG 3'                       |
| Kan3'                   | 5'ATCTAGGTACTAAAACAATTC 3'                       |
| B7F                     | 5'CGCgaatccATCAATGGTCTTTTCACT 3'                 |
| B7FlagR                 | 5'AGTTTGCTCAGTGGTAAGGACTACAAAGACGATGA            |

|            |                                                                                                                              |
|------------|------------------------------------------------------------------------------------------------------------------------------|
| B7F oligo1 | <b>CGACAAGTGA</b> <i>gtcgac</i> GCTC 3'                                                                                      |
| B7-2XFLAG  | 5'CTTGCATGGCTATGATGTG 3'                                                                                                     |
| oligo 2    | 5'CAAAGACGATGACGACA <b>AGGACTACAAAGACGATG</b><br><b>ACGACAAGGACTACAAAGACGATGACGACAAGTGA</b><br><b>atatagattgaaaagtgat 3'</b> |
| B7 oligo3  | 5' <b>cccagtttgcactgataa</b> TTGGAAGAAAAAAGGGAGAG 3'                                                                         |
| B7 oligo 4 | 5'GTTATATTGTTCAATGGTTTTTAG 3'                                                                                                |

---

Italics indicates restriction site, Upper case bold indicates FLAG tag sequence, Underlined TGA indicates introduced stop codon, Lower case bold indicates sequence complementary to *C. coli cat* gene or *aphA* gene and bold A (oligo 3'C1cag3stopkan oligo 2) shows introduced nucleotide change to generate a premature stop codon.

**Table S3.** Cag3 interacting non-*cag* PAI proteins identified by mass spectrometry after anti-Cag3 affinity purification.

| <b>Gene Annotation<sup>a</sup></b> | <b>Name/Function</b>                           | <b>Total peptides</b> | <b>Unique Peptides<sup>b</sup></b> | <b>Prophet score</b> |
|------------------------------------|------------------------------------------------|-----------------------|------------------------------------|----------------------|
| HP0319                             | arginyl-tRNA synthetase                        | 2                     | 2                                  | 0.99                 |
| HP0886                             | cysteinyl-tRNA synthetase                      | 2                     | 2                                  | 0.99                 |
| HP0658                             | Glu-tRNA(Gln) amidotransferase subunit B       | 2                     | 2                                  | 0.98                 |
| HP0601                             | flagellin A                                    | 5                     | 5                                  | 0.97                 |
| HP0115                             | flagellin B                                    | 3                     | 3                                  | 0.99                 |
| HP0703                             | transcriptional activator of flagella proteins | 2                     | 2                                  | 0.99                 |
| HP0751                             | putative polar flagellin                       | 2                     | 2                                  | 0.99                 |
| HP1156                             | outer membrane protein (omp25)                 | 3                     | 3                                  | 0.97                 |
| HP0896                             | outer membrane protein (omp19)                 | 13                    | 10                                 | 0.99                 |
| HP0198                             | nucleoside diphosphate kinase (ndk)            | 5                     | 5                                  | 0.99                 |
| HP0162                             | hypothetical protein                           | 2                     | 2                                  | 0.99                 |
| HP0185                             | hypothetical protein                           | 7                     | 6                                  | 0.99                 |
| HP1042                             | hypothetical protein                           | 2                     | 2                                  | 0.99                 |
| HP0468                             | hypothetical protein                           | 4                     | 3                                  | 0.98                 |
| HP0385                             | hypothetical protein                           | 2                     | 2                                  | 0.97                 |
| HP0305                             | conserved hypothetical                         | 2                     | 2                                  | 0.95                 |
| HP0508                             | plasminogen binding protein                    | 4                     | 4                                  | 0.97                 |
| HP1550                             | secD                                           | 2                     | 2                                  | 0.96                 |
| HP0298                             | dppA                                           | 2                     | 2                                  | 0.97                 |
| HP0646                             | galU                                           | 2                     | 2                                  | 0.99                 |
| HP1257                             | pyrE                                           | 2                     | 2                                  | 0.99                 |
| HP0005                             | pyrF                                           | 2                     | 2                                  | 0.99                 |
| HP0191                             | frdB                                           | 2                     | 2                                  | 0.99                 |
| HP0723                             | L-asparaginaseII                               | 2                     | 2                                  | 0.99                 |
| HP0850                             | type I restriction enzyme M protein            | 2                     | 2                                  | 0.97                 |
| HP0857                             | phosphoheptose isomerase                       | 2                     | 2                                  | 0.99                 |
| HP1088                             | transketolase                                  | 2                     | 2                                  | 0.99                 |
| HP0691                             | succinyl-CoA-transferase subunit A             | 2                     | 2                                  | 0.99                 |
| HP0692                             | succinyl-CoA-transferase subunit B             | 3                     | 3                                  | 0.95                 |



|         |                                                   |   |   |      |
|---------|---------------------------------------------------|---|---|------|
| HP0557  | accA, acetyl-coenzyme<br>A carboxylase            | 2 | 2 | 0.99 |
| HP1137  | ATP synthase F0.<br>subunit b'                    | 2 | 2 | 0.98 |
| HP0516  | hslU, heatshock<br>protein ATP-binding<br>subunit | 4 | 4 | 0.99 |
| HP0723  | L-asparaginaseII                                  | 2 | 2 | 0.99 |
| HP1088  | transketolase                                     | 2 | 2 | 0.99 |
| HP1362  | replicative DNA<br>helicase (dnaB)                | 2 | 2 | 0.99 |
| HP1024  | co-chaperone-curved<br>DNA binding protein A      | 2 | 2 | 0.95 |
| HP0615  | DNA ligase                                        | 4 | 2 | 0.99 |
| HP0275  | ATP-dependent<br>nuclease (addB)                  | 3 | 3 | 0.99 |
| HP0391  | CheA-MCP coupling<br>protein                      | 2 | 2 | 0.99 |
| HP1186  | alpha-carbonic<br>anhydrase                       | 4 | 3 | 0.99 |
| HP0416  | cyclopropane fatty acid<br>synthase               | 2 | 2 | 0.99 |
| HP1350  | carboxyl-terminal<br>protease                     | 3 | 2 | 0.99 |
| HP0416  | Lipid biosynthesis                                | 3 | 3 | 0.96 |
| HP1375  | lpxA                                              | 2 | 2 | 0.99 |
| jhp1349 | lpp20                                             | 5 | 5 | 0.97 |
| HP0098  | thrC                                              | 3 | 3 | 0.99 |
| HP1040  | ribosomal protein S15                             | 2 | 2 | 0.99 |

<sup>a</sup>Gene annotation numbers from strain 26695 genome unless not, then J99 annotation numbers used (<http://cmr.jcvi.org/tigr-scripts/CMR/CmrHomePage.cgi>). <sup>b</sup>Peptides identified in the eluate from wild-type extracts not detected in *cag3* mutant extract eluates.
